# Supplementary material for: Generation of Cascades of Care for Diabetes and Hypertension Care Continuum in Cambodia: Protocol for a Population-Based Survey Protocol
Source: JMIR Res Protoc. 2022 Sep 2;11(9):e36747. doi: 10.2196/36747 (PMC9482065; doi:10.2196/36747)
Supplement: Multimedia Appendix 4 [file resprot_v11i9e36747_app4.pdf]

**Multimedia Appendix 4. Sample of Record Book of Anthropometric and Biochemical Measurements of All the Eligible Individuals**

[illegible]
