# Supplementary material for: Generation of Cascades of Care for Diabetes and Hypertension Care Continuum in Cambodia: Protocol for a Population-Based Survey Protocol
Source: PubMed Central journal article supplement (PMC9482065; doi:10.2196/36747), 2022-09-02
Supplement: resprot_v11i9e36747_app3.pdf [file resprot_v11i9e36747_app3.pdf]

**Multimedia Appendix 3. Sample List of the Eligible Households in Each Village**

|                       |                                                  |                     |                        |                                |
|-----------------------|--------------------------------------------------|---------------------|------------------------|--------------------------------|
| Village Code<br>PR191 | Village/ Commune / District<br>_____/_____/_____ | OD<br>_____         | Health Centre<br>_____ | Listing team :<br>_____        |
| Block: 1              | Contact of local authority: _____                | Scheduled on: _____ | Listed on:<br>_____    |                                |
|                       |                                                  |                     |                        | Data Collection Team:<br>_____ |

| Household Code | Name of Household Head | Household Contact Number | Participant in Household Questionnaire | N. of members >= 40 | Name of eligible individual (unchangeable) |
|----------------|------------------------|--------------------------|----------------------------------------|---------------------|--------------------------------------------|
| PR191 01       |                        |                          |                                        |                     |                                            |
| PR191 02       |                        |                          |                                        |                     |                                            |
| PR191 03       |                        |                          |                                        |                     |                                            |
| PR191 04       |                        |                          |                                        |                     |                                            |
| PR191 05       |                        |                          |                                        |                     |                                            |
| PR191 06       |                        |                          |                                        |                     |                                            |
| PR191 07       |                        |                          |                                        |                     |                                            |
| PR191 08       |                        |                          |                                        |                     |                                            |
| PR191 09       |                        |                          |                                        |                     |                                            |
| PR191 10       |                        |                          |                                        |                     |                                            |
| PR191 11       |                        |                          |                                        |                     |                                            |
| PR191 12       |                        |                          |                                        |                     |                                            |
| PR191 13       |                        |                          |                                        |                     |                                            |
| PR191 14       |                        |                          |                                        |                     |                                            |
| PR191 15       |                        |                          |                                        |                     |                                            |
| PR191 16       |                        |                          |                                        |                     |                                            |
| PR191 17       |                        |                          |                                        |                     |                                            |
| PR191 18       |                        |                          |                                        |                     |                                            |
| PR191 19       |                        |                          |                                        |                     |                                            |
| PR191 20       |                        |                          |                                        |                     |                                            |
| PR191 21       |                        |                          |                                        |                     |                                            |
| PR191 22       |                        |                          |                                        |                     |                                            |
| PR191 23       |                        |                          |                                        |                     |                                            |
| PR191 24       |                        |                          |                                        |                     |                                            |

*Note: Participant in household questionnaire can be any household member aged 18 and above and well-informed about the household situation (including the eligible individual).*
