# Supplementary material for: Generation of Cascades of Care for Diabetes and Hypertension Care Continuum in Cambodia: Protocol for a Population-Based Survey Protocol
Source: PubMed Central journal article supplement (PMC9482065; doi:10.2196/36747), 2022-09-02
Supplement: resprot_v11i9e36747_app5.pdf [file resprot_v11i9e36747_app5.pdf]

**Multimedia Appendix 5. Sample Record book of HbA1c and Creatinine for Known T2D Patients or Participants having FBG ≥126 mg/dl**

| Village Code                |    |    | Village/ Commune / District | Health Centre | Data Collector : _____ |           |                |                    |
|-----------------------------|----|----|-----------------------------|---------------|------------------------|-----------|----------------|--------------------|
| PR191                       |    |    | ____/____/____              | _____         | Collected on: _____    |           |                |                    |
| Code of eligible individual |    |    | Name of eligible individual | Sex           | T2D condition          |           | HbA1c (mmol/m) | Creatinine (mg/dl) |
|                             |    |    |                             |               | Known                  | Suspected |                |                    |
| PR191                       | 01 | 01 |                             |               |                        |           |                |                    |
| PR191                       | 02 | 01 |                             |               |                        |           |                |                    |
| PR191                       | 03 | 01 |                             |               |                        |           |                |                    |
| PR191                       | 04 | 01 |                             |               |                        |           |                |                    |
| PR191                       | 05 | 01 |                             |               |                        |           |                |                    |
| PR191                       | 06 | 01 |                             |               |                        |           |                |                    |
| PR191                       | 07 | 01 |                             |               |                        |           |                |                    |
| PR191                       | 08 | 01 |                             |               |                        |           |                |                    |
| PR191                       | 09 | 01 |                             |               |                        |           |                |                    |
| PR191                       | 10 | 01 |                             |               |                        |           |                |                    |
| PR191                       | 11 | 01 |                             |               |                        |           |                |                    |
| PR191                       | 12 | 01 |                             |               |                        |           |                |                    |
| PR191                       | 13 | 01 |                             |               |                        |           |                |                    |
| PR191                       | 14 | 01 |                             |               |                        |           |                |                    |
| PR191                       | 15 | 01 |                             |               |                        |           |                |                    |
| PR191                       | 16 | 01 |                             |               |                        |           |                |                    |
| PR191                       | 17 | 01 |                             |               |                        |           |                |                    |
| PR191                       | 18 | 01 |                             |               |                        |           |                |                    |
| PR191                       | 19 | 01 |                             |               |                        |           |                |                    |
| PR191                       | 20 | 01 |                             |               |                        |           |                |                    |
| PR191                       | 21 | 01 |                             |               |                        |           |                |                    |
| PR191                       | 22 | 01 |                             |               |                        |           |                |                    |
| PR191                       | 23 | 01 |                             |               |                        |           |                |                    |
| PR191                       | 24 | 01 |                             |               |                        |           |                |                    |
